# Supplementary material for: Nanoparticle-coated microcrystals
Source: Royal Society of Chemistry journal article supplement (doi:10.1039/b501046b), 2005-01-01
Supplement: b501046b.pdf [file b501046b.pdf]

## Preparation of nanoparticle-coated microcrystals via bottom-up self-assembly

Muthu Murugesan,<sup>a</sup> Douglas Cunningham,<sup>a</sup> José Martínez-Albertos,<sup>a</sup> Ranko M. Vrcelj<sup>a</sup> and Barry D. Moore\*<sup>a</sup>

### Supplementary Information

#### Powder X-Ray Diffraction

X-ray powder diffraction patterns were collected using a Siemens D500 diffractometer, using  $\text{CuK}_\alpha$  radiation, Bragg-Brentano geometry and a post-sample monochromator. The patterns revealed that both forms were of the Arcanite form of  $\text{K}_2\text{SO}_4$ . The refined unit cells are given in Table 1 and show that there is no difference between the two samples. There are no impurity phases present and there appears to be no separate crystalline phase of the nanoparticles. Using the derived unit cells, the morphology of the crystals observed under SEM can be ascertained. The large flat face can be ascribed to the (001) Miller planes. The slight side faces seem for some crystals define the other faces to be {100}, {010} and {210} families of Miller planes

**Table 1.** Refined unit cell parameters of the  $\text{K}_2\text{SO}_4$  microcrystals without and with nanoparticles coating. The form is Arcanite, which has space group Pmcn.

|       | $\text{K}_2\text{SO}_4$ | $\text{K}_2\text{SO}_4$ + nanoparticles |
|-------|-------------------------|-----------------------------------------|
| $a_0$ | 0.57648(4) nm           | 0.57626 (8) nm                          |
| $b_0$ | 1.00444(4) nm           | 1.00420 (9) nm                          |
| $c_0$ | 0.74551 (3) nm          | 0.74522 (7) nm                          |

#### DSC

As shown in Figure 2 the enthalpy obtained from the exotherm at 220 C is directly proportional to nanoparticle loading above monolayer coverage.

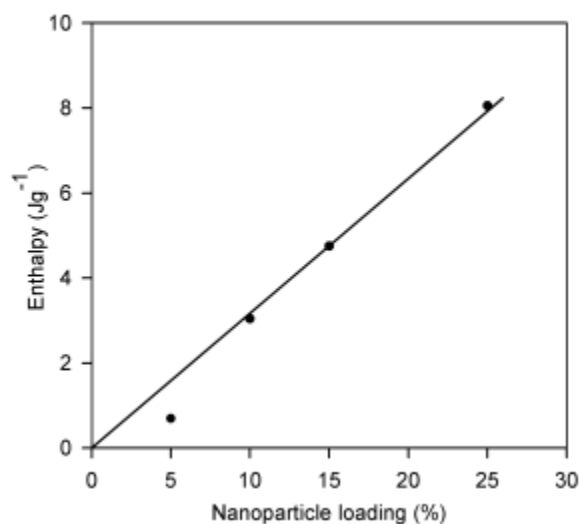

**Fig. 2.** Plot of enthalpy associated with sintering of nanoparticles against wt % loading of nanoparticle coated  $\text{K}_2\text{SO}_4$  microcrystals.

The DSC trace for the pure nanoparticles (Fig. 2) shows a broader exotherm at a slightly lower temperature than that observed for nanoparticles coated on the crystals.

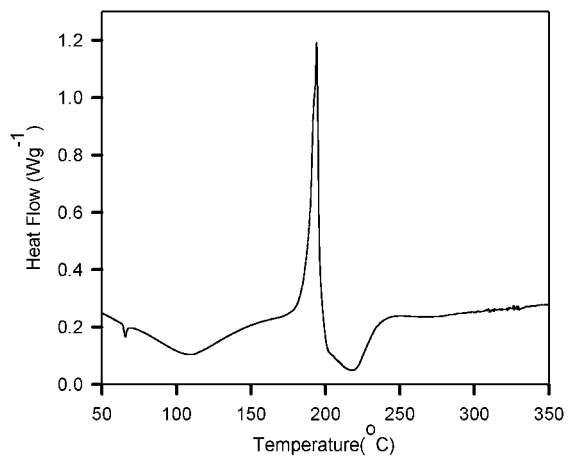

**Fig.2** DSC thermogram of pure Au-Tiopronin nanoparticle in N<sub>2</sub> atmosphere.
